# Supplementary material for: Anodic electrogenerated chemiluminescence behavior and the choline biosensing application of blue emitting conjugated polymer dots
Source: Royal Society of Chemistry journal article supplement (doi:10.1039/c6cc02182d), 2016-01-01
Supplement: c6cc02182d1.pdf [file c6cc02182d1.pdf]

1                                   **Electronic Supplementary Information**  
2                                   **Anodic Electrogenenerated Chemiluminescence Behavior**  
3                                   **and the Choline Biosensing Application of Blue Emitting**  
4                                   **Conjugated Polymer Dots**

5                                   **Hongmei Chen, Qiyi Lu, Jiayao Liao, Ruo Yuan and Shihong Chen\***

6   **1 Experimental**

7   *1.1 Reagents and chemicals*

8           The polyfluorene derivative poly (9,9-dioctylfluorenyl-2,7-diyl) (PFO, MW 147000, polydispersity  
9   O<sub>2</sub>, C<sub>60</sub> were obtained from Aladdin Ltd. (Shanghai, China). Toluene, tetrahydrofuran  
10 (THF), choline chloride, and choline oxidase were obtained from Sigma Chemical Co.  
11 (St. Louis, MO, USA). Polyamidoamine (PAMAM, generation 5) was purchased  
12 from Weihai CY Dendrimer Technology Co., Ltd (Weihai, China). Phosphate-  
13 buffered saline (PBS) solutions with different pH were prepared with 0.10 M  
14 Na<sub>2</sub>HPO<sub>4</sub> and 0.10 M KH<sub>2</sub>PO<sub>4</sub> (containing 0.10 M supporting electrolyte KCl). The  
15 human serum samples were gotten from the 9th People's Hospital of Chongqing. Ultra  
16 pure water was used throughout the whole experimental process. All other chemicals  
17 were of analytical grade without further purification.

18   *1.2 Apparatus*

---

\*Corresponding author   **Tel:** +86-23-68253172   **Fax:** +86-23-68253172

**E-mail address:** [cshong@swu.edu.cn](mailto:cshong@swu.edu.cn). (S.Chen)

19 The ECL emission was monitored by a MPI-E electrochemical analyser (Xi'an  
20 Remax Analyse Instrument Co. Ltd, Xi'an, China) in PBS (0.10 M, pH 7.0) with the  
21 voltage of the photomultiplier tube (PMT) set at 800 V in the detection. Cyclic  
22 voltammetry (CV) and electrochemical impedance spectroscopy (EIS) measurements  
23 were performed with a CHI 600D electrochemical work station (Shanghai Chenhua  
24 Instruments Co., China) in 3.0 mL 0.10 M PBS (pH 7.0) containing 5.0 mM  
25  $K_3[Fe(CN)_6]/K_4[Fe(CN)_6]$ . Fourier transform infrared spectroscopy (FT-IR) was  
26 performed on an IFS 66 V/S (Bruker) IR spectrometer in the range of 400~4000  $cm^{-1}$ .  
27 Fluorescence spectrometry was performed on a FR-5301-PC spectrophotometer  
28 (Shimadzu, Tokyo, Japan) at room temperature with the range of 420~550 nm. The  
29 UV-visible (UV-vis) spectrometry was performed on a Lambda 17 UV-vis  
30 spectrometer 8500 (PECo., USA) with the range of 200~600 nm. The morphology  
31 and size of various nanomaterials were analyzed using a scanning electron  
32 microscopy (SEM) (SEM, S-4800, Hitachi, Japan) with an acceleration voltage of 10  
33 kV. The fluorescent photos were gotten by UV transilluminator (Shanghai clinx  
34 Science Instruments Co., CUV 10).

### 35 *1.3 Preparation of PFO Dots*

36 PFO dots were synthesized according to the literature<sup>1</sup> with some changes. In  
37 brief, 4 mg of PFO was dissolved in 2 mL of THF by stirring overnight at the room  
38 atmosphere. The mixture was filtered with a 0.7 m glass fiber filter to remove  
39 insoluble material. Subsequently, 8 mL of water was added into the solution to  
40 prepare the polymer dots. Then, THF was removed by partial vacuum evaporation.

41 After a small fraction of aggregates were removed through twice centrifugation at  
42 6000 rpm for 5 min, the obtained PFO dots were dispersed in 4 mL ultra pure water.

#### 43 *1.4 Preparation of C<sub>60</sub>-PAMAM*

44 Firstly, C<sub>60</sub> aqueous solution was prepared via a phase-transfer method by adding  
45 C<sub>60</sub> toluene solution into ultra pure water. Simply, 5.0 mL C<sub>60</sub>-toluene solution (1  
46 mg/mL) was mixed with 2.5 mL ultra pure water by ultrasound. Then, 4 mg of  
47 PAMAM was dissolved in 1 mL of ultra pure water to get 4 mg/mL PAMAM  
48 solution. Subsequently, 5 μL PAMAM (4 mg/mL) and freshly prepared 500 μL C<sub>60</sub>  
49 aqueous solution (2.5 mg/mL) were mixed together with ultrasound to form positively  
50 charged C<sub>60</sub>-PAMAM nanocomposite with affluent amino groups.

#### 51 *1.5 Preparation of C<sub>60</sub>-PAMAM-PFO*

52 In this work, the C<sub>60</sub>-PAMAM-PFO nanocomposite was prepared through  
53 electrostatic adsorption between the negatively charged PFO dots and positively  
54 charged C<sub>60</sub>-PAMAM. The above prepared C<sub>60</sub>-PAMAM (500 μL) and PFO dots (1.5  
55 mL) were mixed by ultrasound, followed by centrifuging and washing twice with  
56 water to get C<sub>60</sub>-PAMAM-PFO nanocomposite. The prepared C<sub>60</sub>-PAMAM-PFO was  
57 dispersed in ultra pure water and stored at 4 °C when not used. The preparation  
58 process of C<sub>60</sub>-PAMAM-PFO composite was illustrated in Scheme 1.

#### 59 *1.6 Preparation of the modified electrodes*

60 Firstly, a glassy carbon electrode (GCE,  $\Phi=4.0$  mm) was sequentially polished

61 with 0.3  $\mu\text{m}$  and 0.05  $\mu\text{m}$  alumina slurries and ultrasonically cleaned in ethanol and  
62 water. 20  $\mu\text{L}$  of  $\text{C}_{60}$ -PAMAM-PFO dispersion was cast onto the surface of cleaned  
63 GCE and air-dried at room temperature to get  $\text{C}_{60}$ -PAMAM-PFO/GCE. Then 8  $\mu\text{L}$  of  
64 Chox solution (100 U/mL) was further modified onto the  $\text{C}_{60}$ -PAMAM-PFO/GCE to  
65 prepare the biosensor (Chox/ $\text{C}_{60}$ -PAMAM-PFO/GCE). The fabrication process of the  
66 biosensor was illustrated in Scheme 1. For a control experiment,  $\text{C}_{60}$ -PAMAM/GCE,  
67 PFO/GCE,  $\text{C}_{60}$ -PFO/GCE, and PAMAM-PFO/GCE were prepared through dropping  
68 20  $\mu\text{L}$  of corresponding solution onto the surface of a cleaned GCE.

### 69 *1.7 Experimental determination*

70 The SEM images were collected as the following steps. Firstly, the dispersion of  
71 different nanomaterials was dropped onto the silicon wafer and dried at the room  
72 temperature. Then, the modified silicon wafers were used to perform the SEM  
73 measurements, thus achieving corresponding SEM images. During this process, the  
74 samples wasn't coated with a metal layer.

75 The EIS and CV measurements were performed in 3.0 mL 0.10 M PBS (pH 7.0)  
76 containing 5.0 mM  $\text{K}_3[\text{Fe}(\text{CN})_6]/\text{K}_4[\text{Fe}(\text{CN})_6]$  (1:1). The ECL detection was  
77 performed in 3.0 mL 0.10 M PBS. The whole measurement process was supported by  
78 a conventional three electrode system at the room temperature. A modified GCE was  
79 used as working electrode, a platinum wire as auxiliary electrode, and a saturated  
80 calomel electrode (SCE) as reference electrode for electrochemical measurements and  
81 Ag/AgCl (saturated KCl) as reference electrode for ECL detection. The ECL

82 determination was based on the change in ECL intensity ( $\Delta I = I_t - I_0$ ). Herein,  $I_t$  and  $I_0$   
83 are the ECL signals with and without the substrate, respectively.

## 84 2 Results and discussion

### 85 2.1 Characterization of nanomaterials

86 UV-Vis absorption spectroscopy was used to identify the formation of C<sub>60</sub>-  
87 PAMAM-PFO nanocomposite and the results were shown in Fig. S1A. For PFO  
88 (curve a), a peak at 408 nm was observed, which was attributed to the  $\pi$ - $\pi^*$  transition  
89 of the fluorene units. The peak at 435 nm was due to the formation of polyfluorene's  
90 crystalline  $\beta$  phase. Additionally, an absorption peak of PFO was observed at 205 nm,  
91 which was caused by the  $\pi$ - $\pi^*$  transition of the aromatic compound. For C<sub>60</sub> (curve b),  
92 three strong optical absorption peaks were observed at 218, 263 and 344 nm,  
93 respectively. For C<sub>60</sub>-PAMAM (curve c), two absorption peaks at 229 nm and 286 nm  
94 were ascribed to PAMAM. Compared to C<sub>60</sub>-PAMAM (curve c), the characteristic  
95 peaks of PFO were observed at 410 nm and 438 nm in C<sub>60</sub>-PAMAM-PFO (curve d),  
96 indicating that C<sub>60</sub>-PAMAM-PFO has been successfully prepared.

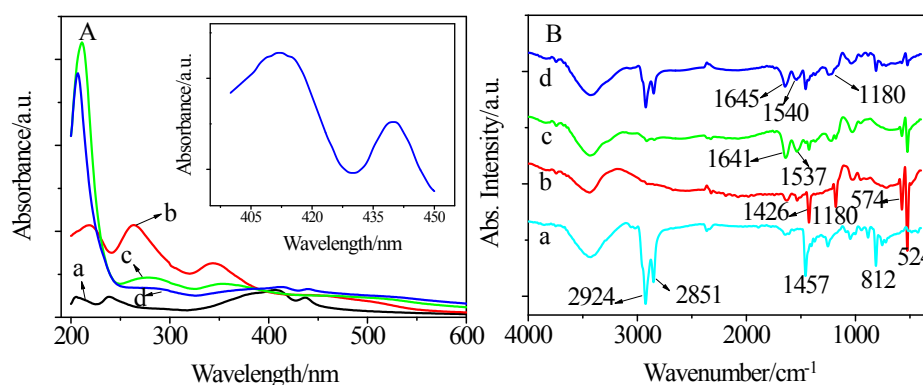

97

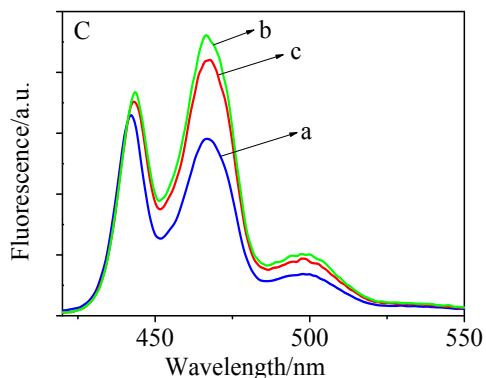

98

99 **Fig. S1 (A)** UV-vis absorption spectra and **(B)** FT-IR spectra of (a) PFO, (b) C<sub>60</sub>, (c) C<sub>60</sub>-PAMAM,  
 100 and (d) C<sub>60</sub>-PAMAM-PFO. The inset of Fig. S1A: the enlarged picture of curve d in the range of  
 101 400~450 nm. **(C)** The fluorescence spectra of (a) PFO dots and (b) C<sub>60</sub>-PAMAM-PFO  
 102 nanocomposite without H<sub>2</sub>O<sub>2</sub>. The fluorescence spectra of (c) C<sub>60</sub>-PAMAM-PFO nanocomposite  
 103 with 0.05 mM H<sub>2</sub>O<sub>2</sub>.

104 The FT-IR spectroscopy was also used to characterize the formation of C<sub>60</sub>-  
 105 PAMAM-PFO nanocomposite and the results were shown in Fig. S1B. For PFO  
 106 (curve a), two peaks at around 2851 cm<sup>-1</sup> and 2924 cm<sup>-1</sup> were observed in the range of  
 107 2500~3000 cm<sup>-1</sup>, which were due to the C–H stretching vibrations of the alkyl chain  
 108 of PFO. The alkyl C–H rocking mode appeared at 812 cm<sup>-1</sup>. The peak at 1457 cm<sup>-1</sup>  
 109 was assigned to the aromatic ring breathing vibration. For C<sub>60</sub> (curve b), because of  
 110 the typical dipole-allowed, the characteristic bands of C<sub>60</sub> were observed at 524, 574,  
 111 1180 and 1426 cm<sup>-1</sup>, respectively. Compared with C<sub>60</sub> (curve b), C<sub>60</sub>-PAMAM (curve c)  
 112 appeared two new band peaks at 1641 and 1537 cm<sup>-1</sup>, which were due to amides (–  
 113 CO–NH–) I and II of PAMAM, respectively. In the case of C<sub>60</sub>-PAMAM-PFO (curve  
 114 d), all characteristic peaks of PFO, C<sub>60</sub> and PAMAM could be observed. Furthermore,  
 115 one amide (–CO–NH–) peak of PAMAM located at 1641 cm<sup>-1</sup> red-shifted to 1645 cm<sup>-1</sup>

116 <sup>1</sup> and the other amide (–CO–NH–) peak of PAMAM located at 1537 cm<sup>-1</sup> red-shifted  
117 to 1541 cm<sup>-1</sup>, which might be affected by the aromatic ring of PFO. Above results  
118 indicated the successful preparation of C<sub>60</sub>-PAMAM-PFO composite.

119 The fluorescence (FL) spectra also were performed and the results were shown in  
120 Fig. S1C, as observed, in the absence of H<sub>2</sub>O<sub>2</sub>, PFO dots (curve a) presented three  
121 well resolved vibronic peaks at 443nm, 468 nm and 497 nm, respectively, which were  
122 consistent with the previous reports<sup>1</sup>. Compared with PFO (curve a), the FL spectra of  
123 C<sub>60</sub>-PAMAM-PFO (curve b) without H<sub>2</sub>O<sub>2</sub> were almost unchanged. When H<sub>2</sub>O<sub>2</sub> was  
124 added into the C<sub>60</sub>-PAMAM-PFO dispersion (curve c), the FL spectra of C<sub>60</sub>-  
125 PAMAM-PFO were also almost unchanged, compared to the case of without H<sub>2</sub>O<sub>2</sub>  
126 (curve b).

127 In this work, the PFO dots were prepared by injecting PFO-THF solution into  
128 water to solve the poor water-solubility of PFO. In order to compare the water  
129 solubility of the PFO and PFO dots, 1 mg PFO and 1 mg PFO dots were dispersed in  
130 2 mL ultra pure water with vigorous ultrasound for 10 min and then stayed 10 min,  
131 respectively. As shown in Fig. S2, the PFO dots (b) were dispersed in water uniformly,  
132 while the PFO was floated on the surface of the water (a). Obviously, the limitation of  
133 poor solubility of PFO would be well solved by using PFO dots instead of PFO for  
134 constructing sensors.

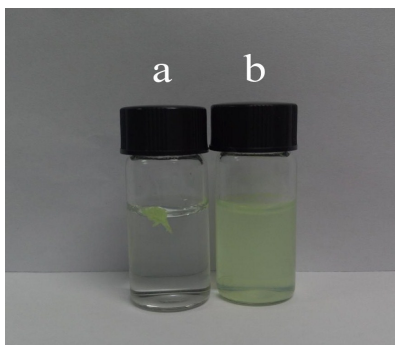

135

136 **Fig. S2** The dispersity of (a) PFO and (b) PFO dots in water.

137 In order to investigate the reproducibility for preparing C<sub>60</sub>-PAMAM-PFO  
138 composites from batch to batch, three batches of C<sub>60</sub>-PAMAM-PFO composite were  
139 prepared and corresponding SEM images were shown in Fig. S3. As expected, the  
140 SEM images of different batches with the same synthetic method were analogous,  
141 indicating a good reproducibility for the preparation of C<sub>60</sub>-PAMAM-PFO. What's  
142 more, the relative standard deviation (RSD) of ECL responses for three different  
143 batches was 1.46%, as shown in Fig. S4, suggesting that the effect of the variation in  
144 composition of C<sub>60</sub>-PAMAM-PFO on the detection results was negligible.

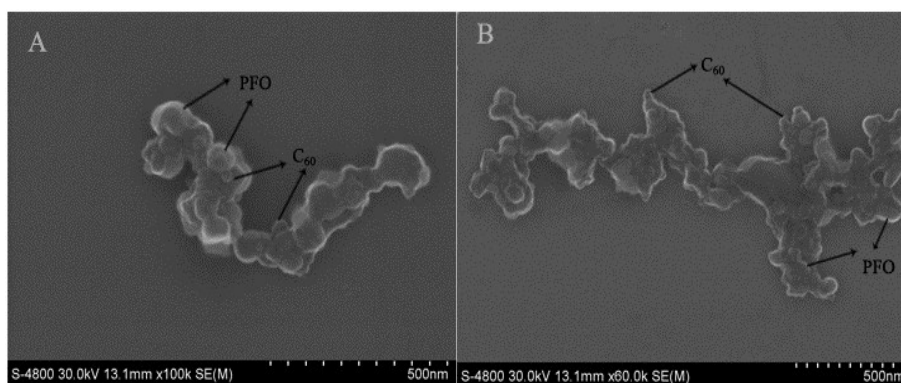

145



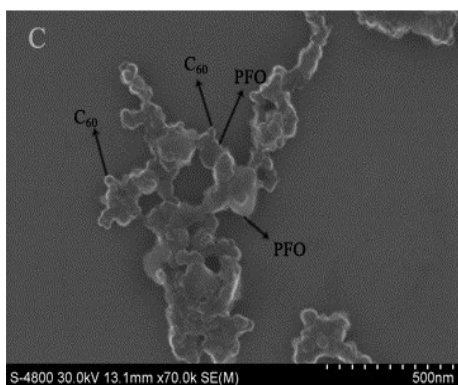

146

147 **Fig. S3** SEM images of C<sub>60</sub>-PAMAM-PFO modified films with three different batches.

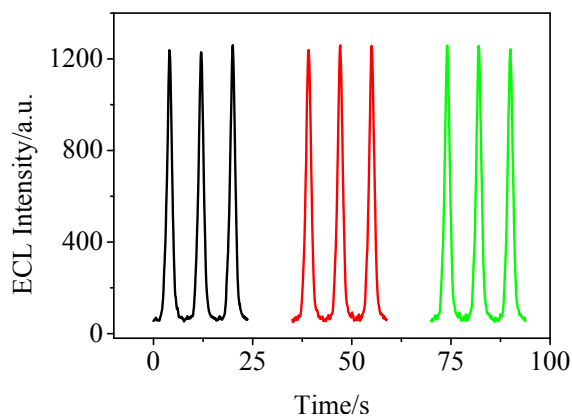

148

149 **Fig. S4** The ECL responses of C<sub>60</sub>-PAMAM-PFO/GCE to  $3.50 \times 10^{-8}$  M choline with three  
 150 different batches in 0.10 M PBS (pH 7.0).

151 In addition, in order to more clearly identify the difference between the PFO dots  
 152 and C<sub>60</sub>, the ECL behaviours of C<sub>60</sub>-PAMAM nanocomposite and PFO-C<sub>60</sub>-PAMAM  
 153 nanocomposite were studied. As expected, no ECL signal was observed at the ECL  
 154 curve of C<sub>60</sub>-PAMAM modified electrode (Fig. S5, curve a). However, for PFO-C<sub>60</sub>-  
 155 PAMAM modified electrode, an obvious ECL signal was observed at 1.97 V.  
 156 Obviously, such an ECL signal resulted from the annihilation reaction of PFO. These  
 157 results indicated that the successful synthesis of PFO-C<sub>60</sub>-PAMAM. These results

158 indicated that the successful synthesis of PFO-C<sub>60</sub>-PAMAM, furthermore also can  
159 provide a strong evidence to identify the difference between the PFO dots and C<sub>60</sub>.

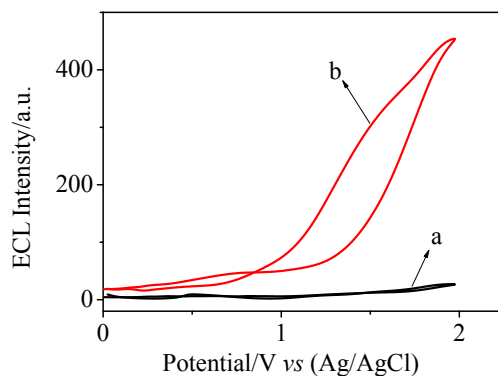

160

161 **Fig. S5** ECL behaviors of (a) C<sub>60</sub>-PAMAM/GCE and (b) PFO-C<sub>60</sub>-PAMAM/GCE in 0.10 M  
162 PBS (pH 7.0).

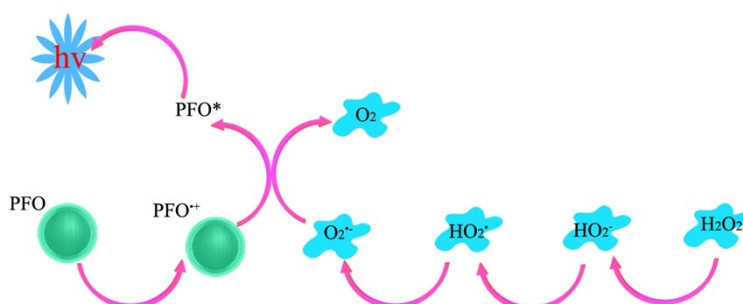

163

164 **Scheme S1** Diagram of the ECL mechanism of PFO.

165

## 166 2.2 Optimization of experimental conditions

167 The influence of the pH of buffer solution in the ECL response of the biosensor  
168 was investigated and the results were shown in Fig. S6A. As seen, in the presence of  
169  $3.50 \times 10^{-8}$  M choline, the change in ECL intensity ( $\Delta I$ ) at Chox/C<sub>60</sub>-PAMAM-  
170 PFO/GCE increased with the increase of the pH from 5.5 to 7.0 and decreased after

171 pH 7.0, so the pH 7.0 was chosen as the optimal pH. Such an optimal pH may be  
172 ascribed to following reason. On the one hand, the pH would influence the ECL  
173 behavior of PFO-H<sub>2</sub>O<sub>2</sub> system. On the other hand, the catalytic activity of Chox  
174 would be affected by pH.

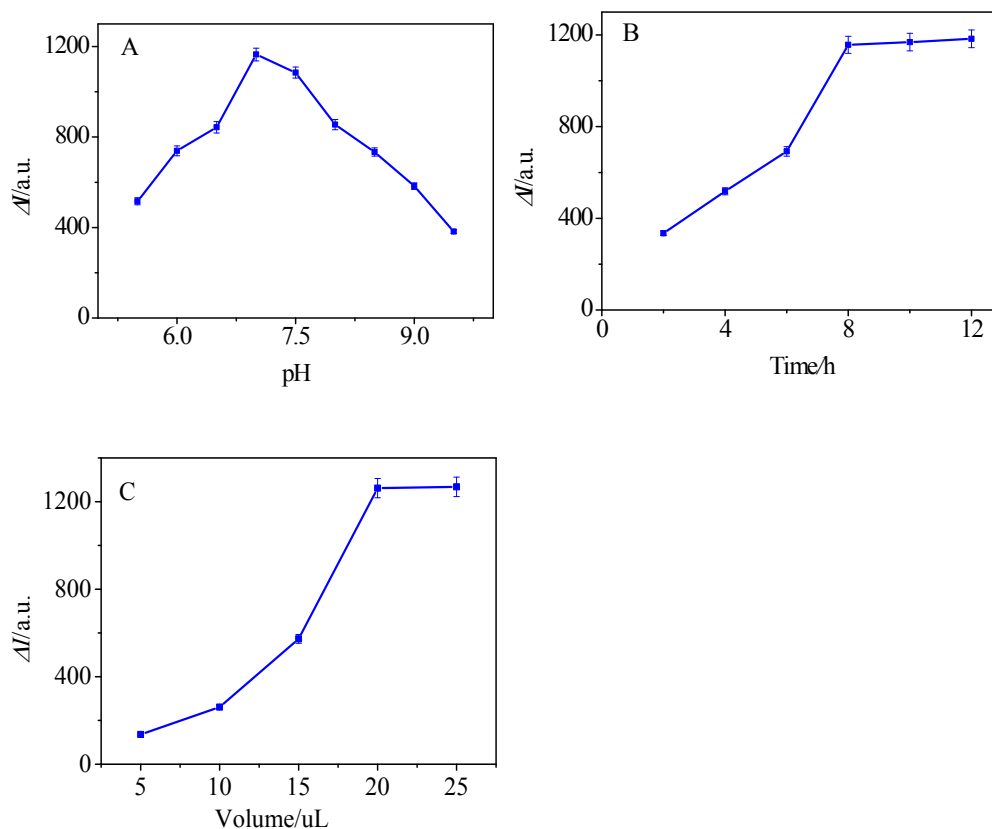

175

176

177 **Fig. S6** Effect of (A) pH, (B) the incubation time of Chox and (C) the amount of C<sub>60</sub>-PAMAM-  
178 PFO on  $\Delta I$  at GCE/C<sub>60</sub>-PAMAM-PFO/GCE to  $3.50 \times 10^{-8}$  M choline in 0.10 M PBS

179 The incubation time of Chox was also optimized since it would influence the  
180 quantity of the Chox modified on the electrode. The change of the  $\Delta I$  at Chox/C<sub>60</sub>-  
181 PAMAM-PFO/GCE with the incubation time of Chox was investigated and the  
182 results were shown in Fig. S6B. As seen, the  $\Delta I$  increased with the increase in  
183 incubated time of Chox from 2 h to 8 h and reached a relatively stable platform over 8

184 h. Thus, 8 h was chosen as the incubation time of Chox.

185       Actually, the quantity of Chox on the electrode is dependent on the amount of  
186 C<sub>60</sub>-PAMAM-PFO modified on the electrode, thus itself was optimized for the  
187 preparation of the biosensor. The optimal amount of C<sub>60</sub>-PAMAM-PFO was achieved  
188 through detecting the change of  $\Delta I$  at the biosensor with the volume of C<sub>60</sub>-PAMAM-  
189 PFO dispersion modified on the electrode. As shown in Fig. S6C, the  $\Delta I$  increased  
190 with the volume of C<sub>60</sub>-PAMAM-PFO dispersion modified on the electrode in the  
191 range of 5~20  $\mu\text{L}$ , and reached a platform after 20  $\mu\text{L}$ . This may be due to the fact  
192 that C<sub>60</sub>-PAMAM-PFO could improve the electro-active surface area of the modified  
193 electrode, thus further improve the quantity of Chox. In order to confirm this  
194 conjecture, the change of the electro-active surface area of the modified electrode  
195 with the volume of C<sub>60</sub>-PAMAM-PFO deposited on the electrode was investigated.  
196 The cyclic voltammograms (CVs) of the modified electrode at different potential scan  
197 rates were recorded with 5.0 mM K<sub>3</sub>Fe(CN)<sub>6</sub>/K<sub>4</sub>Fe(CN)<sub>6</sub> (1:1) as redox probes. Based  
198 on the relation between anodic peak current and square root of the scan rate, the  
199 electroactive surface area of the electrode ( $A$ ) was calculated using Randles-Sevcik  
200 equation<sup>2</sup>

$$201 \quad I_p = 2.69 \times 10^5 \times D^{1/2} \cdot C \cdot A \cdot \nu^{1/2} \cdot n^{3/2}$$

202 For 5  $\mu\text{L}$ , 10  $\mu\text{L}$ , 15  $\mu\text{L}$ , 20  $\mu\text{L}$ , and 25  $\mu\text{L}$  of C<sub>60</sub>-PAMAM-PFO dispersion, the  
203 electro-active surface areas of corresponding modified electrodes were 0.093 cm<sup>2</sup>,  
204 0.127 cm<sup>2</sup>, 0.150 cm<sup>2</sup>, 0.184 cm<sup>2</sup>, and 0.186 cm<sup>2</sup>, respectively. As expected, when the

205 volume of C<sub>60</sub>-PAMAM-PFO dispersion increased from 5 μL to 20 μL, an obvious  
206 increase in electro-active surface area of the modified electrode was noticed. After 20  
207 μL, further increase of the volume of C<sub>60</sub>-PAMAM-PFO dispersion caused only a  
208 slight enhancement in electro-active surface area of the modified electrode. This result  
209 is consistent with that in the case of *ΔI*. Thus, 20 μL of C<sub>60</sub>-PAMAM-PFO dispersion  
210 was chosen for the preparation of the biosensor.

### 211 2.3 Effect of C<sub>60</sub> and PAMAM on the ECL response of the sensor

212 In order to investigate the effect of PFO, C<sub>60</sub> and PAMAM on the PFO-H<sub>2</sub>O<sub>2</sub>  
213 ECL system, the ECL behaviors of different modified electrodes were compared  
214 under the scanning potential in the range of 0~2.0 V, and the results were shown in  
215 Fig. S7. As seen, compared with the bare GCE (curve a), PFO/GCE (curve b), C<sub>60</sub>-  
216 PFO/GCE (curve c), and PAMAM-PFO/GCE (curve d), the target sensor (C<sub>60</sub>-  
217 PAMAM-PFO/GCE) showed the maximum ECL intensity, indicating that both C<sub>60</sub>  
218 and PAMAM exhibited a promoting effect on the ECL intensity in PFO-H<sub>2</sub>O<sub>2</sub> ECL  
219 system. The reasons may be as follows. (1) PFO is a luminophore and presents an  
220 ECL peak at about 1.97 V; (2) PAMAM holds large surface area and activity center,  
221 thus could accelerate the electron transfer rate; (3) C<sub>60</sub> could amplify the ECL signal  
222 of PFO due to the fact that C<sub>60</sub> could accelerate the electron transfer in ECL reaction.

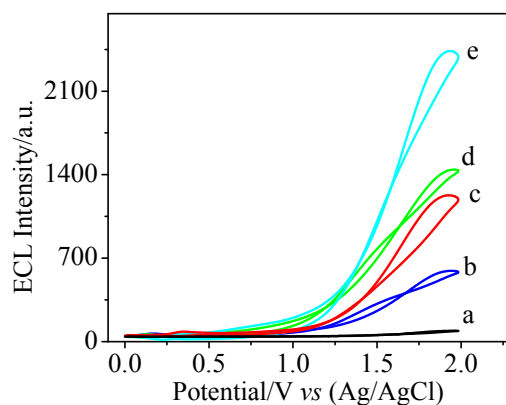

223

224 **Fig. S7** ECL profiles of (a) GCE, (b) PFO/GCE, (c) C<sub>60</sub>-PFO/GCE, (d) PAMAM-PFO/GCE and

225 (e) C<sub>60</sub>-PAMAM-PFO/GCE in 0.10 M PBS (pH 7.0) containing 4.50×10<sup>-7</sup> M H<sub>2</sub>O<sub>2</sub>.

226 **Table S1** Comparison of different non-enzymatic sensors for the determination of H<sub>2</sub>O<sub>2</sub>.

| Electrode materials                 | Determination method | Linear range                   | Detection limit | Reference |
|-------------------------------------|----------------------|--------------------------------|-----------------|-----------|
| AuCu Nanowires                      | Amperometry          | 5.0 nM-360 nM<br>360 nM-440 μM | 2.0 nM          | 3         |
| Core/Shell Au/MnO                   | Amperometry          | 20 nm-100 nm                   | 8.0 nm          | 4         |
| Goldnanocoral                       | ECL                  | 0.1 μM-100 μM                  | 30 nM           | 5         |
| Co <sub>3</sub> O <sub>4</sub> -rGO | Amperometry          | 0.015mM-0.675 mM               | 2.4 μM          | 6         |
| GQDs/AgNPs                          | Colorimetric         | 0.1 μM-100 μM                  | 33 nM           | 7         |
| ZnSe QDs                            | ECL                  | 0.61 μM-310 μM                 | 0.2 μM          | 8         |

---

|                         |     |                 |         |           |
|-------------------------|-----|-----------------|---------|-----------|
| C <sub>60</sub> -PAMAM- | ECL | 2.30 nM-8.05 mM | 0.61 nM | This work |
| PFO                     |     |                 |         |           |

---

227 *2.4 Analytical application of the sensor in serum samples*

228 The analytical reliability and potential application of ECL biosensor was  
 229 evaluated by a standard addition method. Human serum samples were diluted with pH  
 230 7.0 PBS and the results of standard addition method were shown in Table S2. The  
 231 recoveries ranged from 94.7% to 103%, confirming that the proposed biosensor could  
 232 be reasonably applied in human serum samples.

233 **Table S2** Recoveries of choline at the biosensor in human serum samples.

---

| Sample | $c_{\text{Added}}/\mu\text{M}$ | $c_{\text{Found}}^{\text{a}}/\mu\text{M}$ | Recovery/% |
|--------|--------------------------------|-------------------------------------------|------------|
| 1      | 0.150                          | 0.142±0.005                               | 94.7       |
| 2      | 0.250                          | 0.257±0.014                               | 103        |
| 3      | 0.350                          | 0.341±0.006                               | 97.4       |
| 4      | 0.450                          | 0.447±0.028                               | 99.3       |

---

234 1 C. F. Wu, B. Bull, C. Szymanski, K. Christensen and Jason McNeill, *ACS NANO*, 2008,  
 235 **11**, 2415-2423.

236 2 Q. Wang, Y. Song, H. Xie, Y. Q. Chai, Y. L. Yuan, R. Yuan, *Chem. Commun.*, 2015, **51**,  
 237 1255-1258.

238 3 N. Wang, Y. Han, Y. Xu, C. Z. Gao and X. Cao, *Anal. Chem.*, 2015, **87**, 457-463.

- 239 4 H. Y. Zhu, A. Sigdel, S. Zhang, D. Su, Z. Xi, Q. Li and S. H. Sun, *Angew. Chem.*, 2014,  
240 **126**, 12716-12720.
- 241 5 M. Xu, W. J. Qi, L. Zhang, J. P. Lai, A. Rehman, S. Majeed and J. B. Xu, *Microchim*  
242 *Acta.*, 2014, **181**, 737-742.
- 243 6 L. J. Kong, Z. Y. Ren, N. N. Zheng, S. C. Du, J. Wu, J. L. Tang and H. J. Fu, *Nano*  
244 *Research.*, 2015, **8(2)**, 469-480.
- 245 7 Chen, S., Hai, H., Chen, X.W., and Wang, J.H., *Anal. Chem.*, 2014, **86**, 6689-6694.
- 246 8 X. F. Hu, H. Y. Han, H. J. Hua, Z. H. Sheng, *Biosens. Bioelectron.*, 2010, **25**, 1843-1846.
